# Supplementary material
Source: PubMed Central journal article supplement (PMC2755837)
Supplement: supp_M109.026849_jbc.M109.026849-1.pdf [file supp_M109.026849_jbc.M109.026849-1.pdf]

**A**

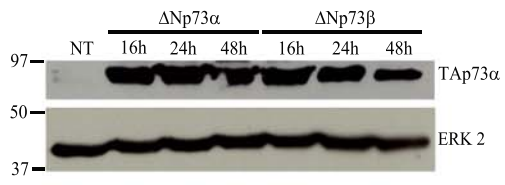

**B**

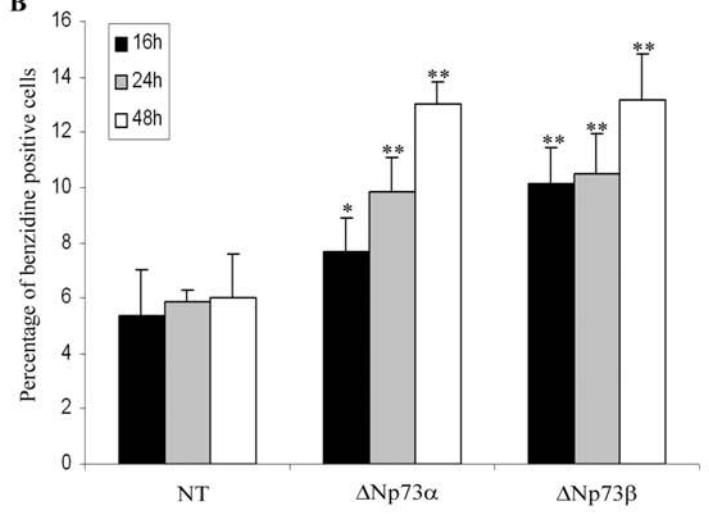

A

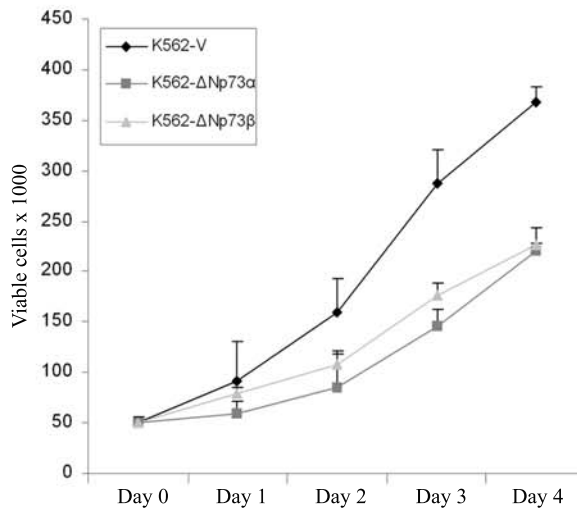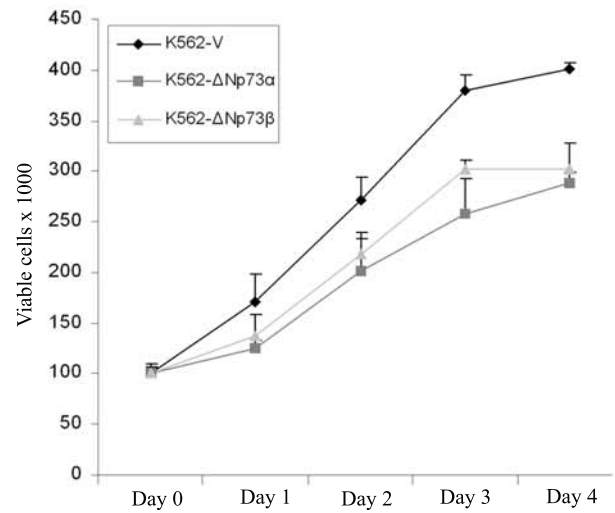

B

|    | K562V | K562ΔNp73α | K562ΔNp73β |
|----|-------|------------|------------|
| G1 | 39,7% | 35,9%      | 38,8%      |
| S  | 29,0% | 31,4%      | 29,1%      |
| G2 | 23,0% | 27,7%      | 23,6%      |

C

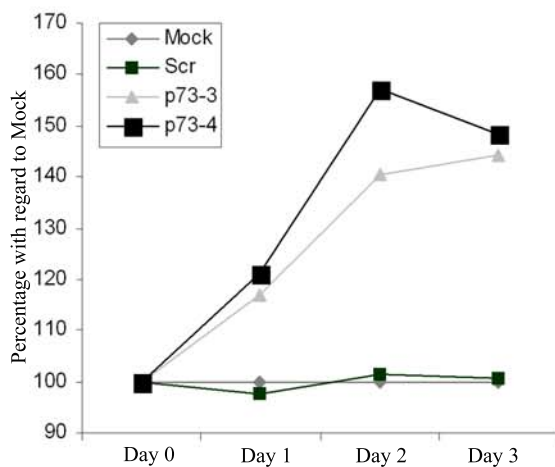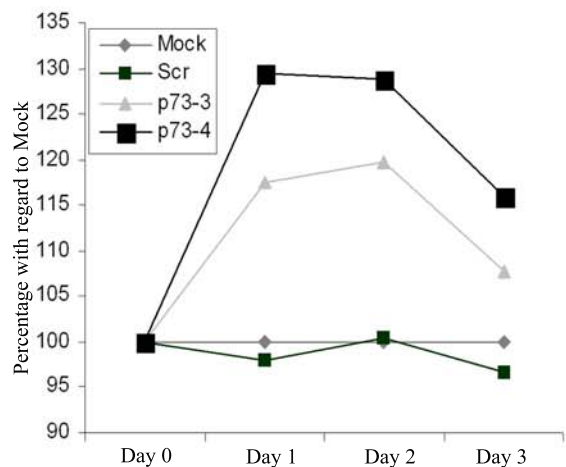

A

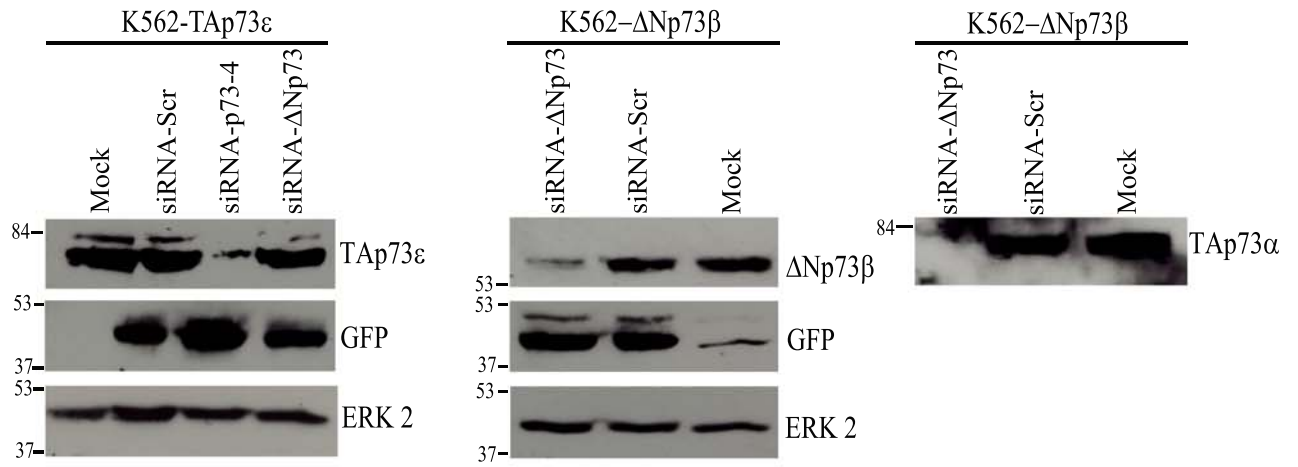

B

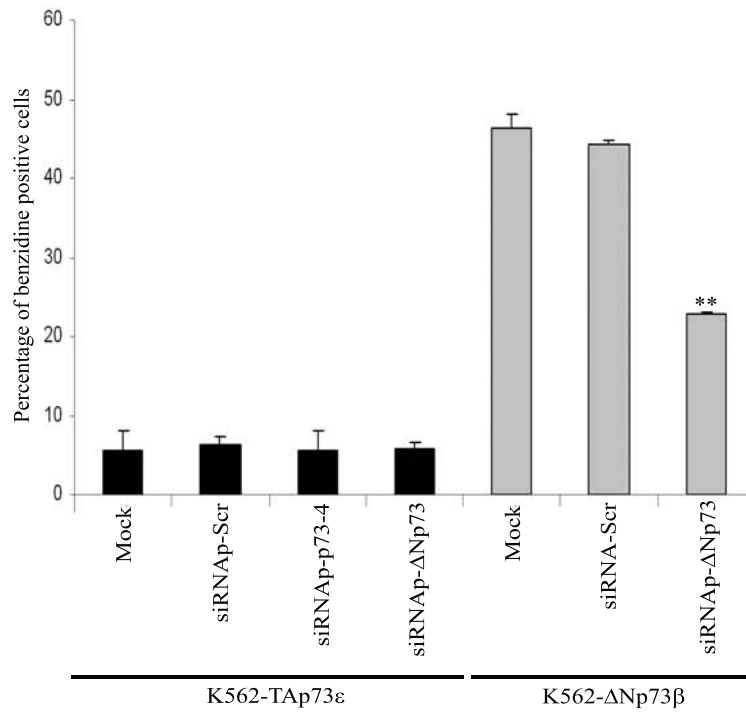

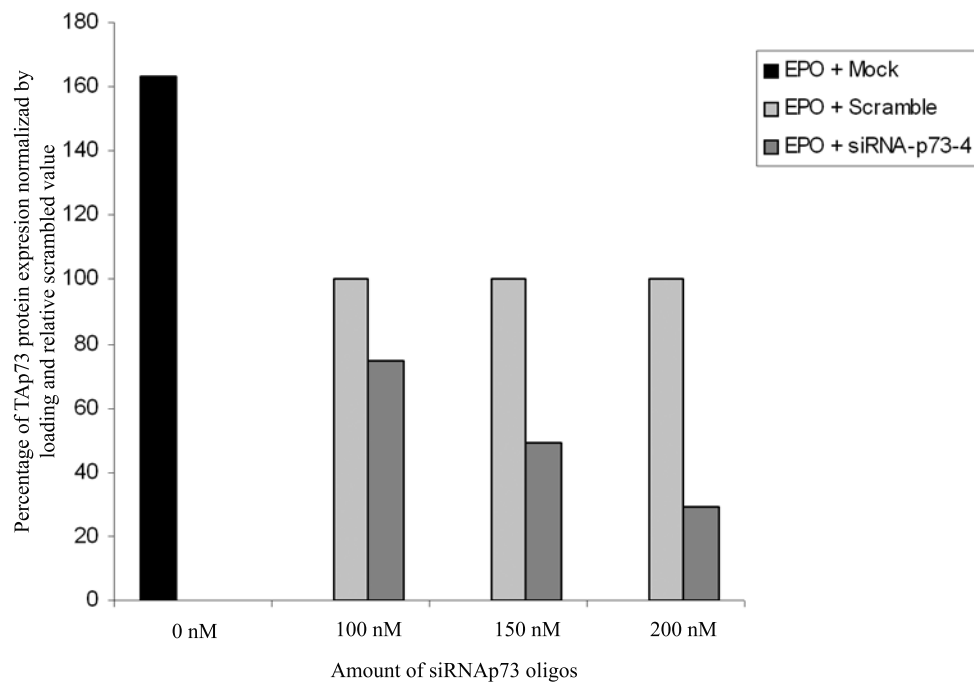

**A**

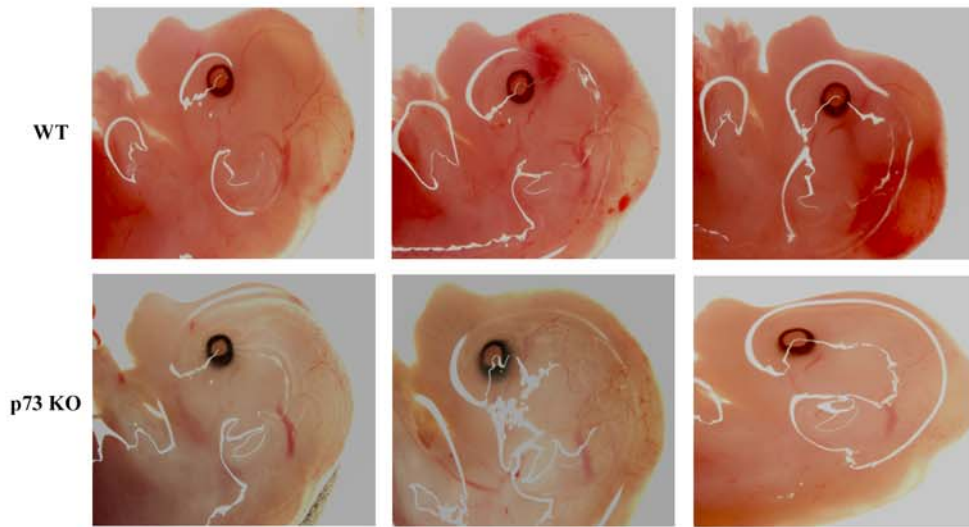

**B**

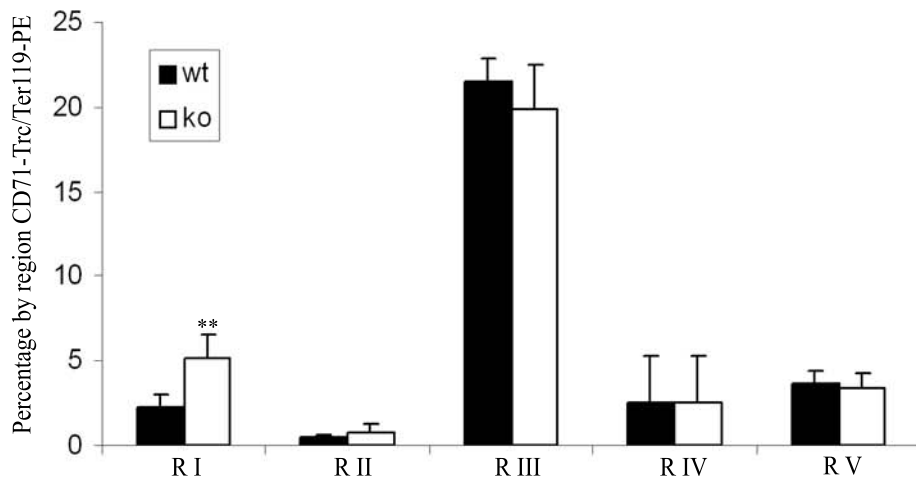

**Primers sequences use for RT-PCR**

| <b>Gene</b>             | <b>Sense</b>             | <b>Antisense</b>      | <b>PCR Cycles</b> | <b>Anneling temperature</b> |
|-------------------------|--------------------------|-----------------------|-------------------|-----------------------------|
| p73                     | ACTTTGAGATCCTGATGAAG     | CAGATGGTCATGCGGTACTG  | 35                | 60°C                        |
| $\Delta$ Np73           | CGGTGACCCCGCACGGCACCTCGC | CAGATGGTCATGCGGTACTG  | 39                | 58°C                        |
| $\epsilon$ -Globin      | GCAAGAAGGTGCTGACTTCC     | TGCCAAAGTGAGTAGCCAGA  | 24                | 56°C                        |
| Glycophorin A           | CATTGATCACTTGTCTCTGG     | GAGAAAGGGTACAACCTTGCC | 24                | 56°C                        |
| Transferrin Receptor II | AGTTGCATCATCAGGCCTTC     | TGGAGGTCCTGTGATTGTTG  | 24                | 56°C                        |
| Gata-1                  | CCAAGCTTCGTGGAACCTCTC    | CCTGCCCGTTTACTGACAAT  | 24                | 56°C                        |
| p21 <sup>Cip1</sup>     | AAGACCATGTGGACCTGTCA     | GGCGTTTGGAGTGGTAGAAA  | 24                | 56°C                        |
| GADPH                   | ACCACAGTCCATGCCATCAC     | TCCACCACCCTGTTGCTGTA  | 30                | 60°C                        |

**Primers sequences use for real-time quatitative RT-PCR**

| <b>Gene</b>               | <b>Sense</b>              | <b>Antisense</b>          |
|---------------------------|---------------------------|---------------------------|
| ε-Globin                  | AACCCTCATCAATGGCCTGTGG    | TCAGTGGTACTTGTGGGACAGC    |
| c-kit                     | GCTCATAAATGGCATGCTCCAGTGT | GAAGTTGCGTCGGGTCTATGTAAAC |
| Transferrin<br>Receptor I | TGGATTCATGAGTGGCTACCTGG   | GTTTCATCTCGCCAGACTTTGCTG  |
| Gata-1                    | ACTCGTCATACCACTAAGGT      | AGTGTCTGTAGGCCTCAGCT      |
| Alas-e                    | GTCCTGTGGAGGAATTGTGT      | GTTTTCCATCATCTGAGGGC      |
| GADPH                     | ACCACAGTCCATGCCATCAC      | TCCACCACCCTGTTGCTGTA      |
